# Supplementary material
Source: bioRxiv or medRxiv preprint supplement (https://www.biorxiv.org/highwire/filestream/129431/field_highwire_adjunct_files/4/430728-5.pdf)

Figure S1

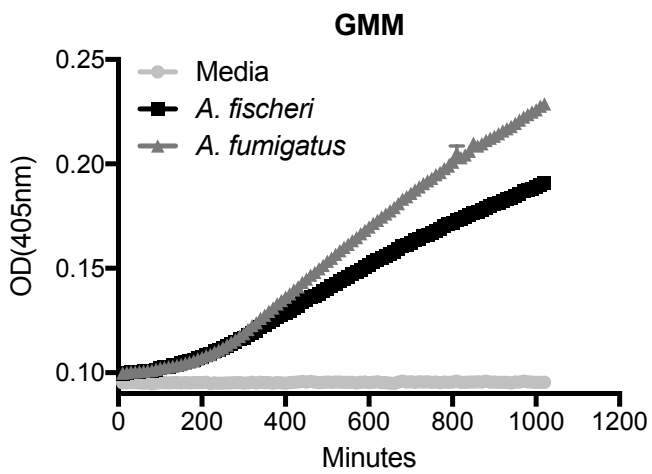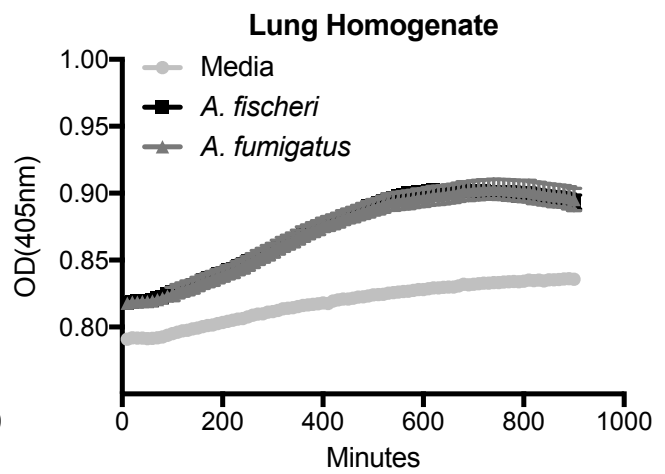

# Figure S2

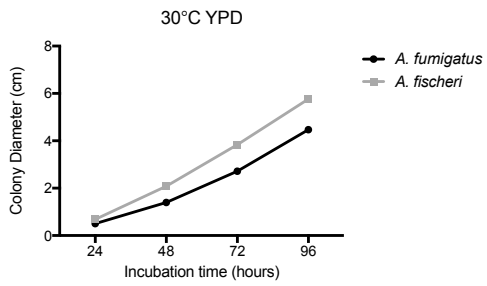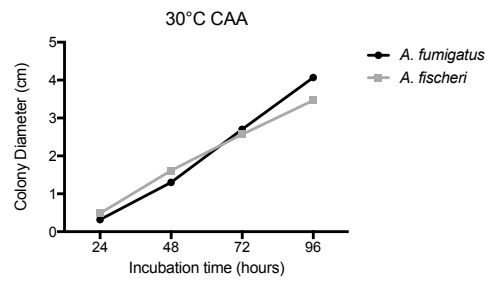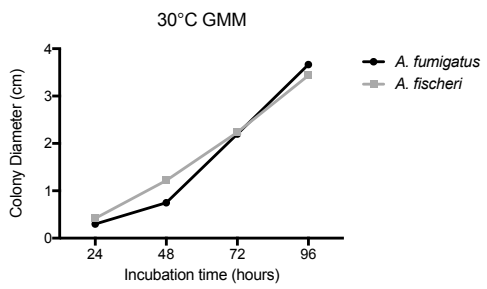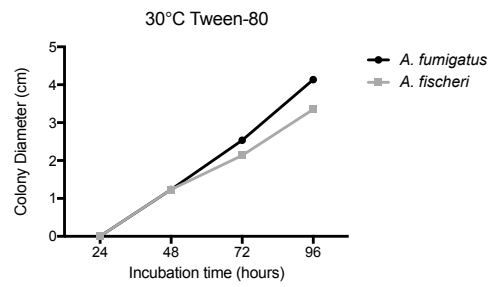

# Figure S3

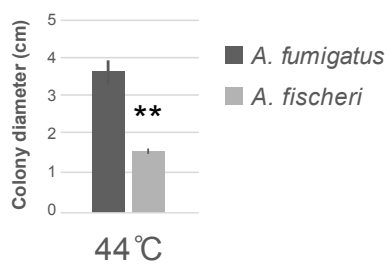

# Figure S4

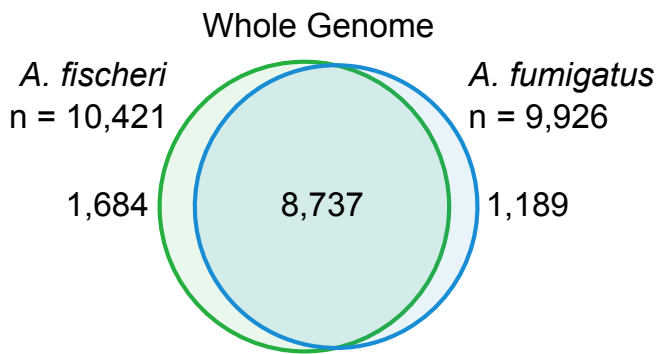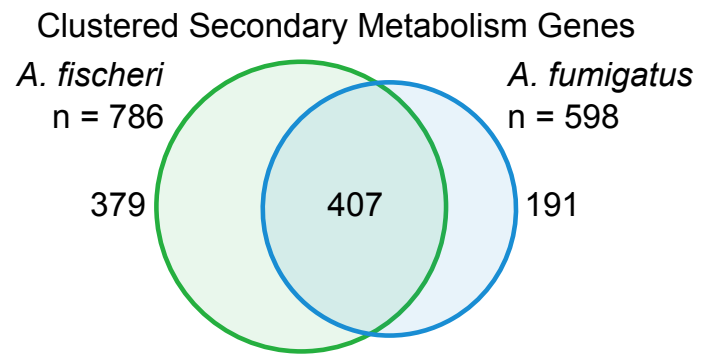

# Figure S5

*A. fumigatus*  
CEA10

*A. fischeri*  
NRRL 181

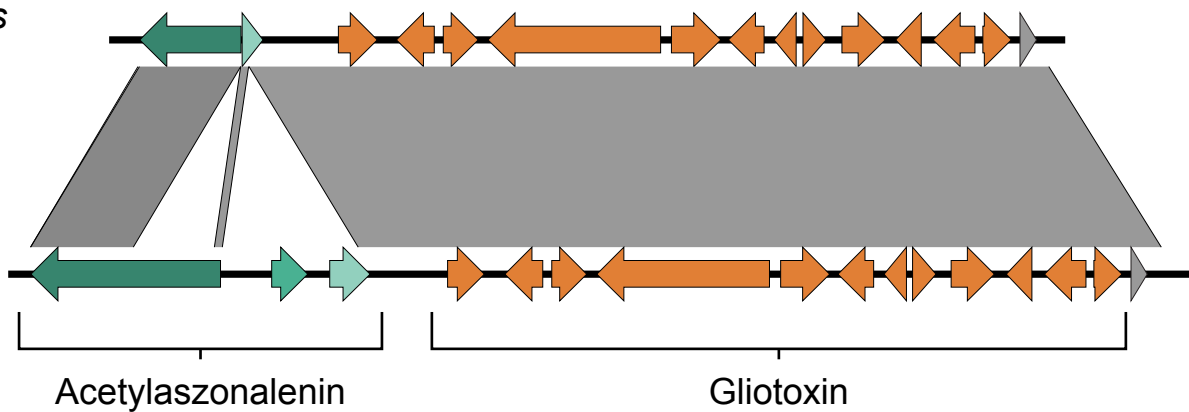

# Figure S6

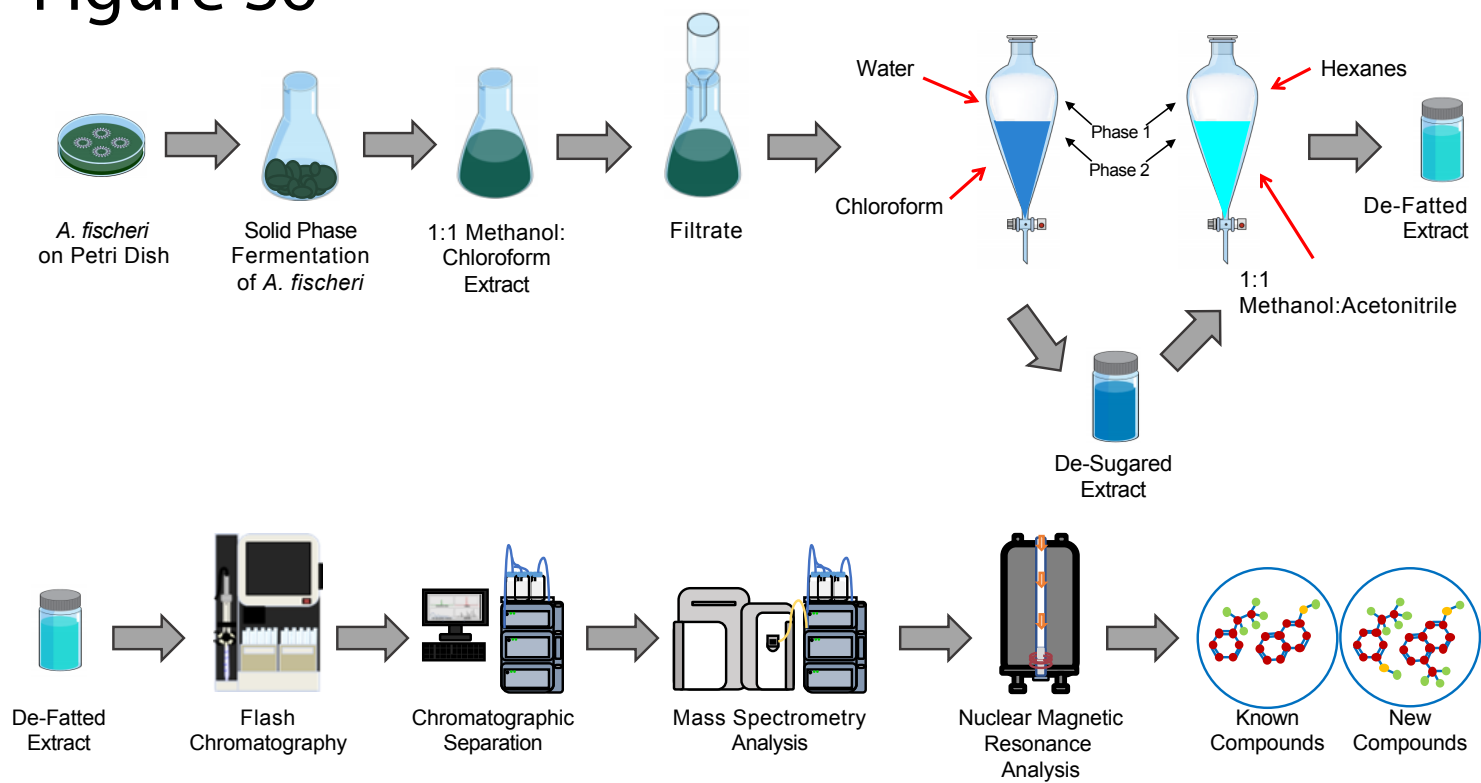

# Figure S7

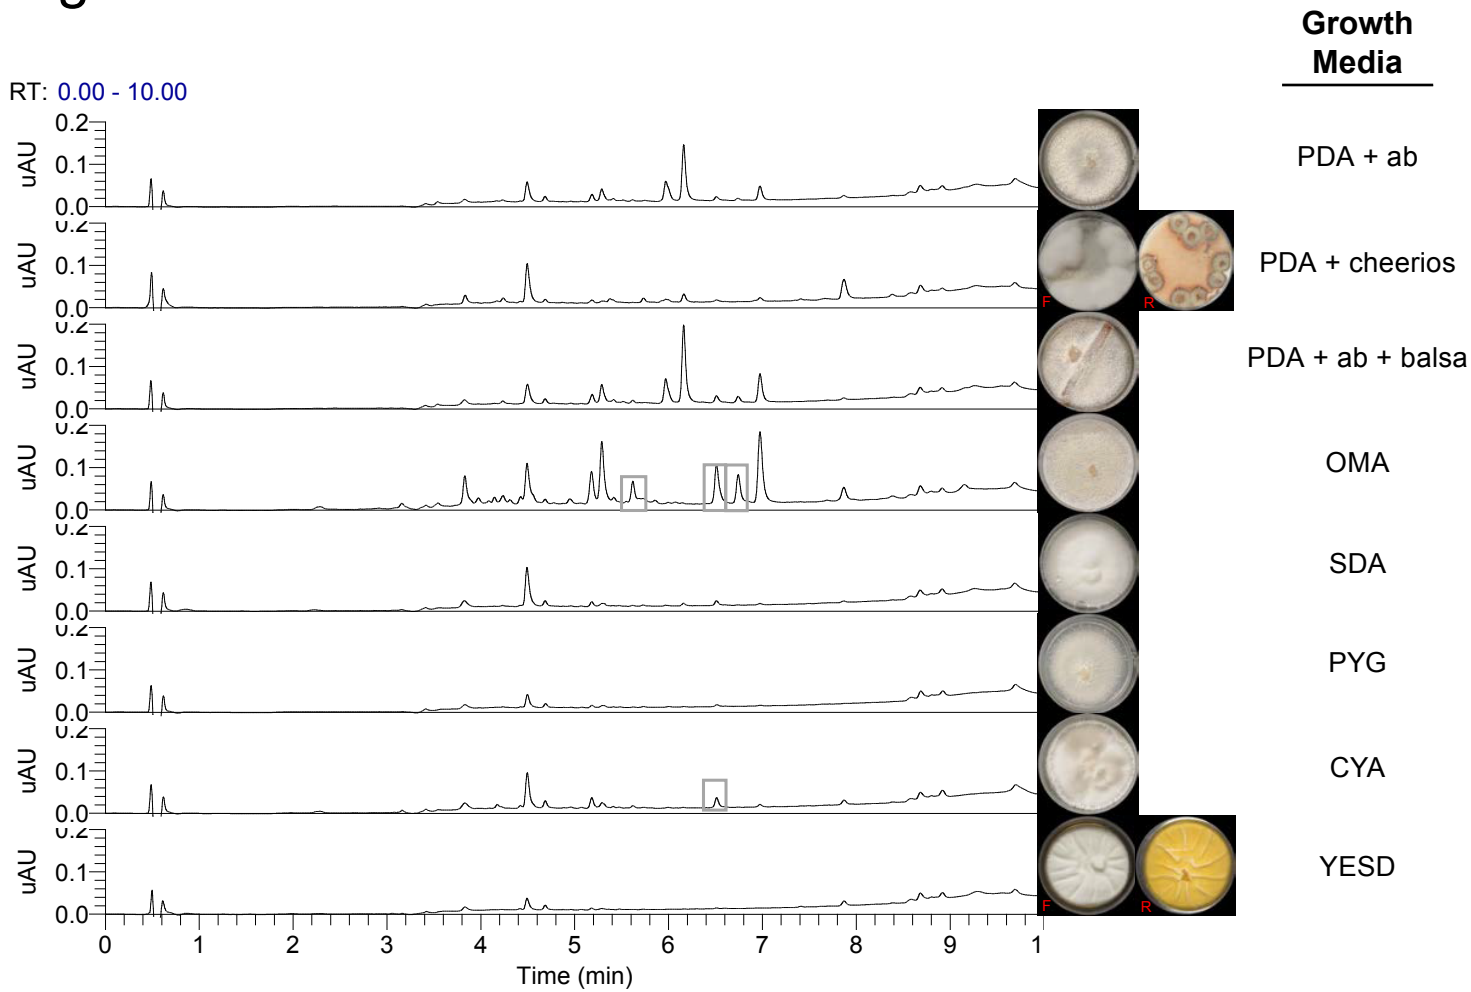

☐ = Difference compared to PDA

# Figure S8

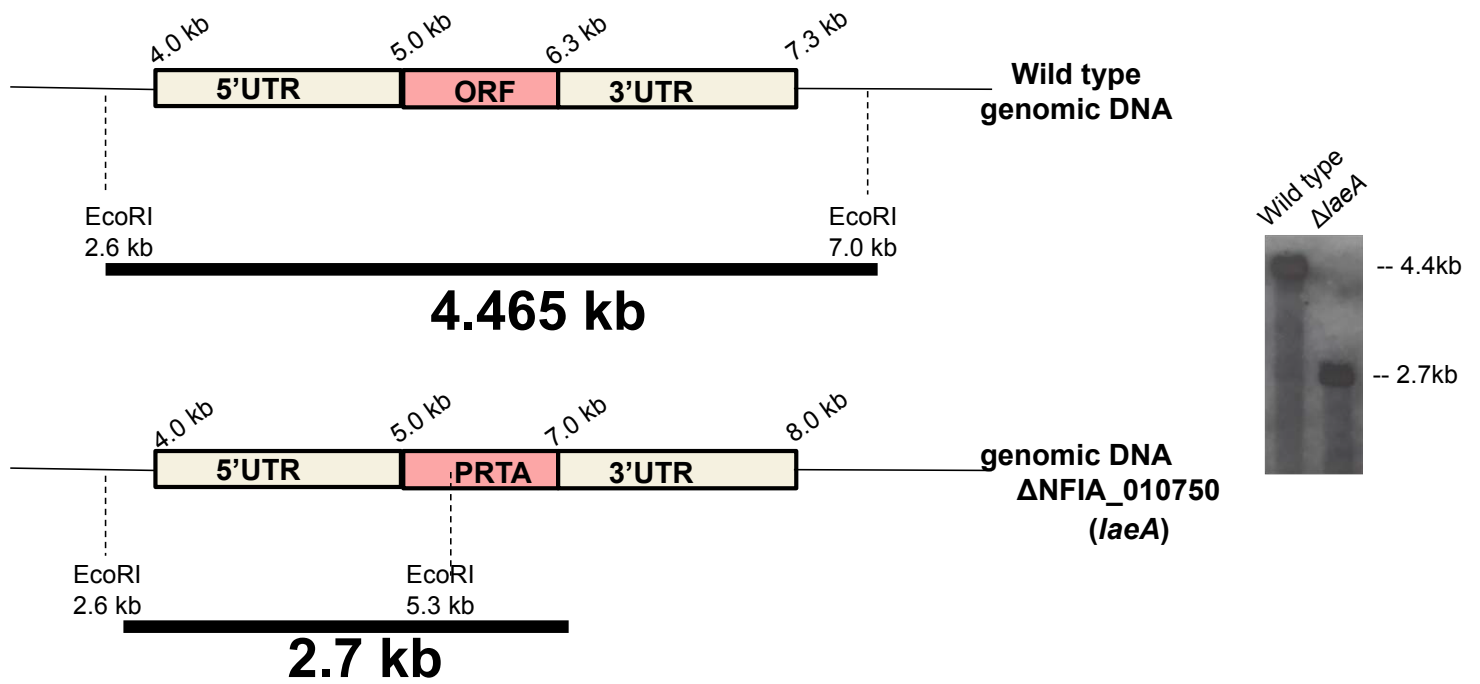

Supplement: Supplementary file [file 430728-5.pdf]
